# Supplementary material for: Comprehensive Factors Influencing Lateral Soil Water Flow Patterns on Hillslopes: Insights from Experimental and Simulation Studies
Source: Copernicus journal article supplement (doi:10.5194/hess-2024-19), 2024-02-13
Supplement: Supplementary file [file hess-2024-19-AC1-supplement.pdf]

## Point-by-point Responses for Reviewer 1 for hess-2024-19

This study implemented a rainfall tracer experiment on a slope to analyze water flow patterns. Simultaneously, the HYDRUS-2D model was employed for scenario simulations, encompassing two rainfall patterns (RP), three soil types (ST), three slope angles (SA), three anisotropy ratios (AR), and two layered slope systems (LS), aiming to deepen comprehension of the those factors affecting lateral water flow on slopes. It has a potential contribution to the community as this topic is not well covered in the previous research, e.g., simulating of subsurface lateral flow based on the observation data. However, the current paper has some deficiencies:

Response: We thank the referee of reading the manuscript and providing helpful comments and suggestions. Here we reply to the comments point-by-point. We hope that these changes satisfy the requirements for proceeding with the publication of the updated manuscript.

I. A significant concern arises from the lack of connection between the experimental data and the model's approach or outputs. Essentially, the model remains unvalidated or untested against experimental data. Furthermore, even for tracer experiments, there was no data provided apart from a picture.

Response: Thank you for your valuable feedback. We acknowledge the concern regarding the lack of connection between the experimental data and the model's approach or outputs. Field experiments primarily serve for qualitative observations of slope soil moisture behavior. They reveal that during the early stages of rainfall, moisture moves upslope, gradually stabilizes, then transitions vertically downward. After rainfall ceases, it flows downslope. However, it's important to emphasize that these observations were made under specific conditions in the field experiments.

In contrast, our two-dimensional numerical model offers a powerful tool for analyzing soil moisture movement under various conditions. To investigate whether similar soil moisture behavior occurs under different circumstances, we conducted scenario simulations. The results from our modeling work provided insights into the changes in the direction of lateral water flow during rainfall under varying conditions.

This approach allowed us to combine qualitative field observations with quantitative modeling to gain a more comprehensive understanding of slope soil moisture dynamics during rainfall events. We believe this combination strengthens the robustness and reliability of our study findings.

Additionally, we established an in-situ monitoring station at the Hongshixia Botanical Garden in Mu Us Sandy Land, China. Soil moisture automatic monitoring probes were installed at six monitoring points on both the windward and leeward slopes of sand dunes, covering the top, middle, and down of the slope. At each location, six soil moisture probes were horizontally installed at depths of 10, 20, 50, 80, 100, and 150 cm, as illustrated in Figure 1.

We employed Hydrus-2D to establish a hydraulic model for simulating soil moisture dynamics on sand dune slopes. The model was calibrated and validated using measured soil moisture data. We evaluated the fitting performance of the model using the root mean square error (*RMSE*) and the agreement of index (*d*), as shown in Figures 2 and 3, respectively.

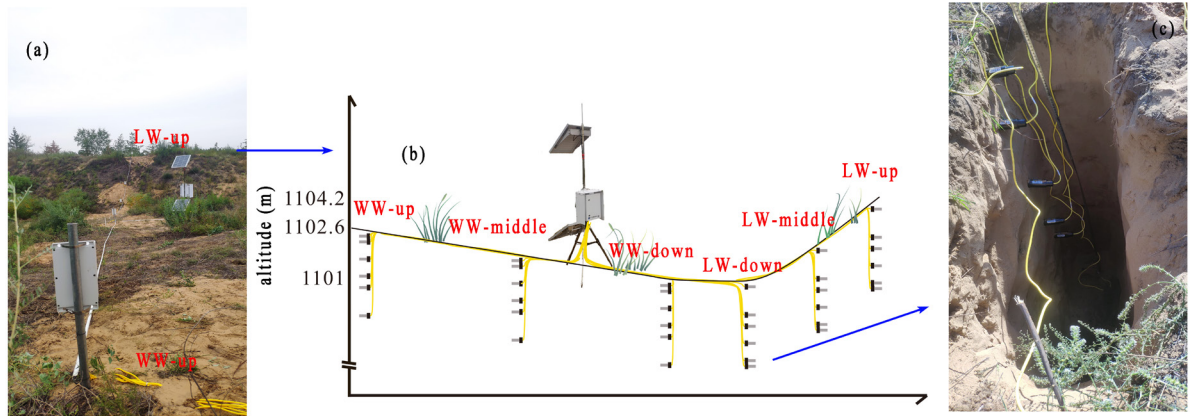

Figure 1. Schematic of the in-situ monitoring station. WW-up, windward up-slope; WW-middle, windward middle-slope; WW-down, windward down-slope; LW-up, leeward up-slope; LW-middle, leeward middle-slope; and LW-down, leeward down-slope.

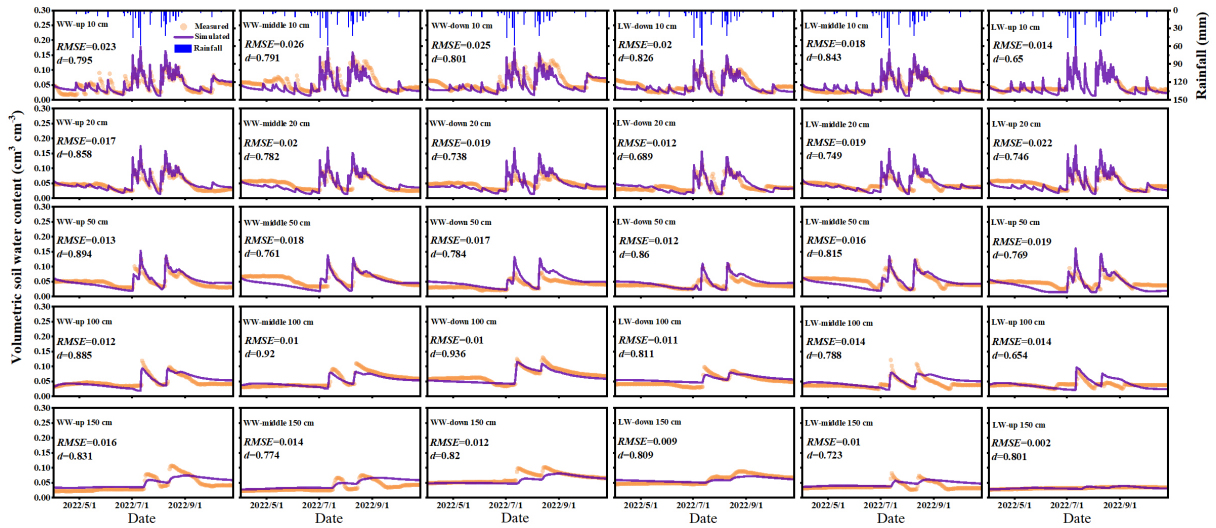

Figure 2. Simulated and measured soil moisture during the calibration period

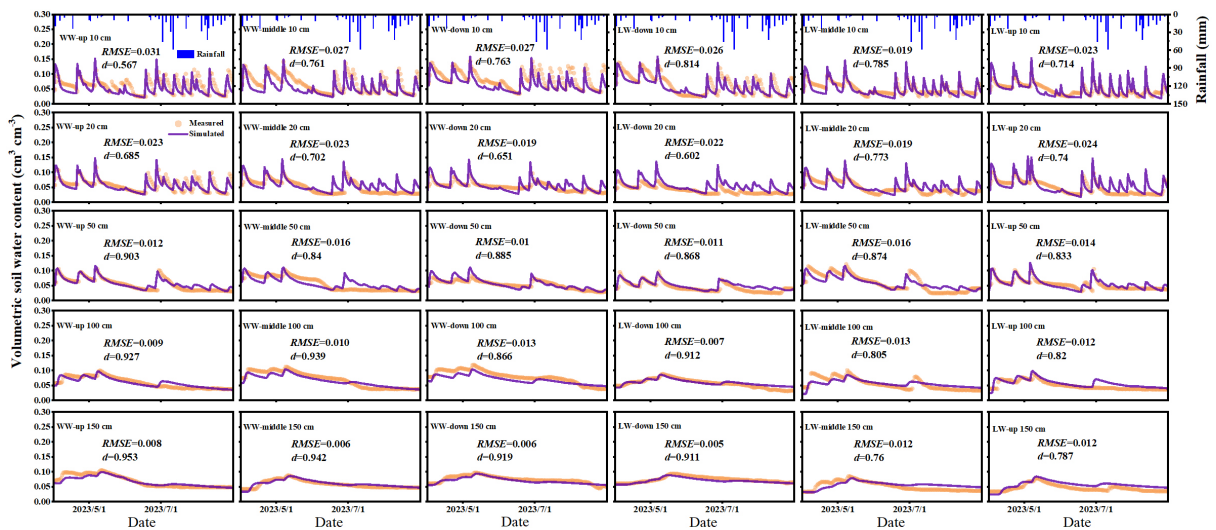

Figure 3. Simulated and measured soil moisture during the validation period

We selected a typical rainfall event to analyze the variation of soil water potential on the slope over time during the rainfall process, aiming to determine changes in soil water flow direction. Additionally, we

employed flow particles to visually observe the flow trajectory of soil moisture on the slope, as depicted in Figure 4. At  $t=0$ , 1 h before the onset of rainfall, and at  $t=2, 5,$  and  $9\text{h}$ , during the rainfall process. Furthermore, at  $t=30, 54, 78,$  and  $102\text{h}$ , representing moments after rainfall cessation. Through analysis of soil water potential changes and flow particle trajectories, we identified three patterns of soil water movement on the slope: lateral upslope and vertical flow during rainfall, followed by lateral downslope flow after rainfall.

The detailed information of these research results will be provided in the next study.

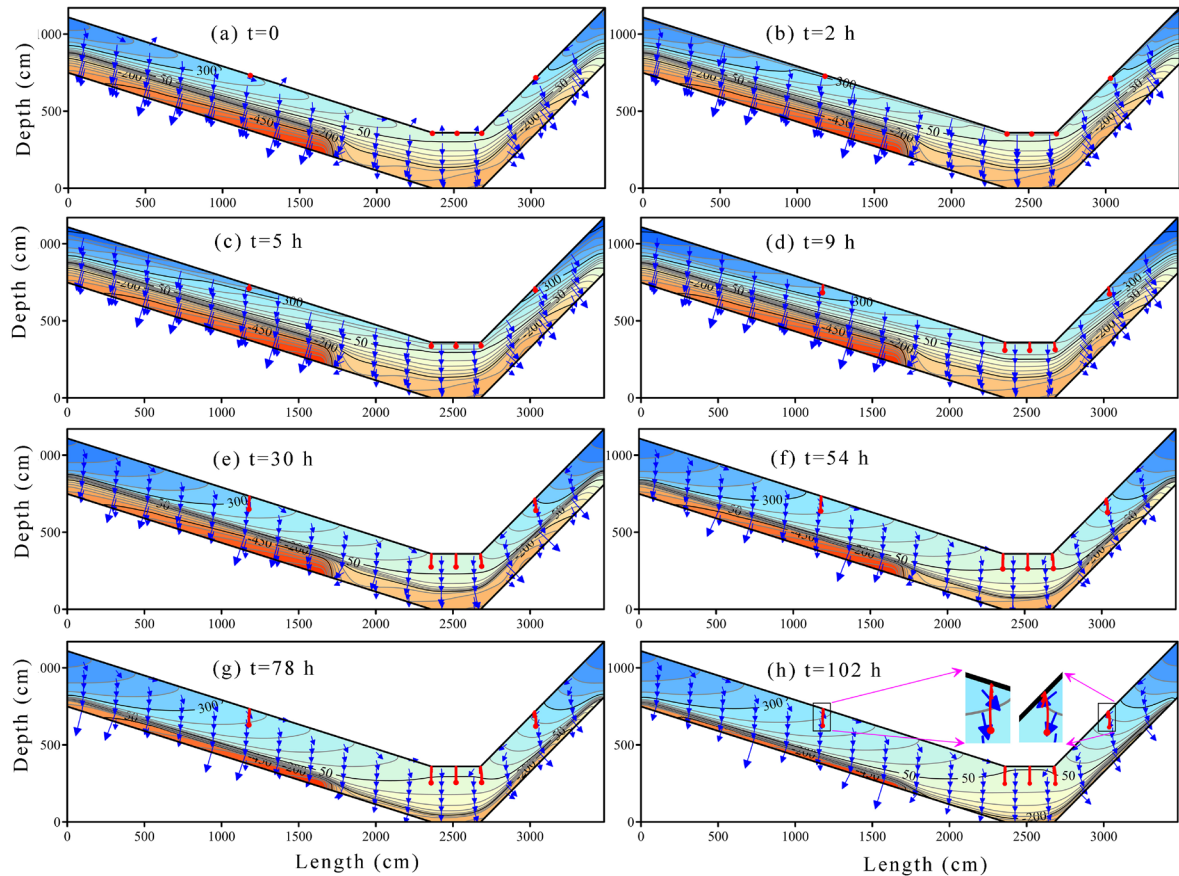

Figure 4. Soil water potential in the model domain during the rainfall event (vertical scaling factor is 1.8). The blue arrows indicate the gradient direction of soil water potential, representing the direction of soil water flow. The red dots and red lines depict tracer particles and their trajectories, respectively.

II. The paper contains an excessive amount of abbreviations, leading to poor readability. The introduction lacks significance, and the contents is not good enough to clearly specify the research's contributions. Furthermore, the literature review is outdated and fails to reflect the recent progress in related research.

Response: Thank you for your feedback. We appreciate your comments regarding the excessive use of abbreviations, readability issues, and the need for a clearer presentation of the research contributions, significance, and updated literature review. In response, we will address these concerns in the revised manuscript.

We will provide a comprehensive list of abbreviations at the end of the manuscript to improve readability and reduce confusion, as follows:

Appendix. List of Abbreviation:

|                             |                                                       |
|-----------------------------|-------------------------------------------------------|
| RP                          | Rainfall patterns                                     |
| ST                          | Soil types                                            |
| SA                          | Slope angles                                          |
| AR                          | Anisotropy ratios                                     |
| LS                          | Layered slope                                         |
| $q_x$ ,                     | Horizontal flux                                       |
| $q_z$                       | Vertical flux                                         |
| DWFFV                       | Deviation of the water flow direction from vertical   |
| $\partial\phi/\partial x$   | Soil water potential horizontal gradient              |
| $\partial\phi/\partial z$   | Soil water potential vertical gradient                |
| $\partial\theta/\partial t$ | Rate of moisture content change as a function of time |

III. The term "deviation of water flow direction from vertical (DWFFV)" could potentially be effectively assessed in HYDRUS by considering the velocity vector. The concept of a layered slope system appears challenging to interpret or assess. It appears to be described as altering the depth of the model domain from 200 cm to 100 cm and incorporating two layers of soil, each 50 cm thick, to represent layered soil, with the interfaces between layers aligned parallel to the slope surface. However, this description lacks clarity for me.

Response: Thank you for your feedback. Indeed, the velocity vector in HYDRUS represents the direction of soil water flow. In this study, we use the vertical direction as the boundary between upslope and downslope lateral flow, with positive DWFFV values indicating lateral upslope flow and negative values representing lateral downslope flow. The magnitude of DWFFV denotes the degree of deviation from the vertical direction. Additionally, we utilize horizontal flux, vertical flux, and the angle of deviation of water flow direction from vertical (DWFFV) to quantitatively analyze the impacts of rainfall patterns, soil types, slope angles, and anisotropy ratios on lateral soil moisture infiltration on the slope.

As for the layered slope system, we understand the necessity for clarity in our description. To observe soil moisture flow at layer interfaces, we reduced the model domain depth from 200 cm to 100 cm, incorporating two soil layers, each 50 cm thick. We aim to illustrate this layered slope system in Figure 5 and will provide clearer explanations, possibly supplemented with visual aids, in the revised manuscript to enhance comprehension.

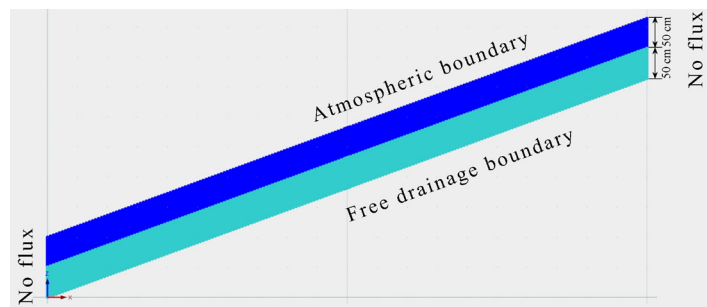

Figure 5. Physical domain, mesh, and boundary conditions for layered slope system.

IV. The finding lacks novelty. I observed that the outcomes demonstrated "complete consistency between the direction of lateral water flow (lateral unsaturated upslope or downslope flow) and soil water potential horizontal gradients ( $\partial\phi/\partial x$ )." Nevertheless, what sets this finding apart as novel?

Response: Thank you for your valuable comments. In the revised manuscript, we will provide a more explicit explanation of the main conclusion regarding lateral water flow on homogeneous isotropic slope. Specifically, we will emphasize that the movement of soil moisture in slope is driven by both gravitational potential and matrix potential. The inconsistency in the directions of gravitational potential gradient and matrix potential gradient leads to lateral flow of soil water on the slope with the angle of deviation from the vertical direction determined by the competition between these gradients. Additionally, we will clarify that changes in boundary conditions and the transition between wetting, stable, and drying states are not synchronous drivers of changes in the direction of lateral soil moisture flow on the slope. At any point on the slope surface, the horizontal gradient of water potential determines the direction of lateral soil moisture flow.

V. To sum up, the paper lacks a clear purpose. I'm unsure about the problem it aimed to address.

Response: Thank you for your feedback. In unsaturated slopes, soil water flow is driven by gravitational and matrix potentials, with the gradients of these potentials determining the direction of soil water flow. Typically, the gradient of the matrix potential does not align with the vertical direction, leading to soil water flow deviating from the vertical direction. Under transient rainfall conditions, unsaturated slopes exhibit complex spatiotemporal patterns of soil water flow, where lateral upslope flow, vertical flow, and lateral downslope flow may coexist at different locations on the slope simultaneously. However, there are still some deficiencies in understanding the lateral soil water flow processes on slope.

Moreover, most previous studies have primarily focused on vertical infiltration of soil moisture on slope, overlooking the lateral flow processes. Therefore, the objectives of this study are twofold: (1) to analyze the lateral flow processes of soil moisture on slope using rainfall dye tracer experiments combined with scenario simulations, and (2) to investigate the effect of different rainfall patterns (RP), slope angles (SA), soil types (ST), anisotropy ratios (AR), and layered slope systems (LS) on slope lateral water flow. Additionally, we will address these concerns in the revised manuscript by providing supplementary explanations and modifications to ensure clarity regarding the purpose and objectives of the study.

More details:

1. Fig 5., the legend did not indicate the difference of slope angle.

Response: Thank you for your feedback. In this section, we primarily focus on analyzing the impact of rainfall patterns (constant and variable rainfall intensity) on the lateral infiltration of soil moisture on the slope. Therefore, we kept other influencing factors such as slope angle, soil type, and anisotropy ratio constant. The influence of slope angle on lateral infiltration of soil moisture is discussed in detail in Section 3.4 of the manuscript.

2. Fig 11., Anisotropy ration should be anisotropy ratio.

Response: sorry, we will correct it.

3. It is unclear why "At the beginning of rainfall, the direction of water flow near the slope surface was

towards the upslope.”

Response: Under transient rainfall conditions, soil moisture flow is driven by both gravitational potential and matric potential. In rainfall event, for homogeneous isotropic flat soil, the total potential gradient driving soil moisture movement is typically vertical, resulting in vertical upward or downward flow with no significant lateral flow. However, in homogeneous isotropic slopes, the gravitational potential gradient remains constant (-1) at any position along the slope, oriented vertically. In contrast, the matric potential gradient, closely related to soil moisture content, can vary significantly and is influenced by the wetting and drying processes of the slope, leading to the direction of slope water movement lying within the angular range between the matric potential gradient and the gravitational potential gradient. At the onset of rainfall, a matric potential gradient directed inward toward the normal slope surface is established, causing the combined force of gravity and matric suction to act in the upslope direction near the slope surface, hence the direction of water flow near the slope surface towards the upslope. As the rainfall continues, the soil moisture flow near the slope gradually transitions to a quasi-steady state, where the moisture flow near the slope is primarily driven by gravity in a quasi-vertical direction. After the rainfall ends, a gradient of matric potential forms in the downslope direction near the slope, leading to lateral downslope water flow.

We will supplement the explanation in the revised manuscript.
